# Supplementary material
Source: publisher figshare collection journal article supplement (https://gsajournals.figshare.com/ndownloader/files/18714689)
Supplement: Supplementary file 1 [file 18714689]

## Sheet: Sheet1
Code	Gene_id	90128_24_readcount(90128_24vsck)	ck_readcount(90128_24vsck)	log2FoldChange(90128_24vsck)	pval(90128_24vsck)	padj(90128_24vsck)	significant(90128_24vsck)	90128_72_readcount(90128_72vs90128_24)	90128_24_readcount(90128_72vsJ_24)	log2FoldChange(90128_72vs90128_24)	pval(90128_72vs90128_24)	padj(90128_72vs90128_24)	significant(90128_72vs90128_24)	90128_72_readcount(90128_72vsck)	ck_readcount(90128_72vsck)	log2FoldChange(90128_72vsck)	pval(90128_72vsck)	padj(90128_72vsck)	significant(90128_72vsck)	biological_process	biological_process_description	cellular_component	cellular_component_description	molecular_function	molecular_function_description	KEGG AnnotInfo	KEGG url	Gene name	Interpro Description
1	Novel00139	59.9559	16.5745	1.8549	0.0024091	0.0087649	UP	156.925	55.3935	1.5023	0.0019473	0.013063	UP	163.046	15.3809	3.4061	7.8114e-08	3.8498e-06	UP	--	--	--	--	--	--	--	--	--	--
2	Novel00784	16.9424	0.30619	5.7901	0.0007698	0.0032611	UP	79.0699	15.7417	2.3285	0.00013893	0.0014949	UP	82.0758	0.287341	8.158	3.0573e-13	5.0365e-11	UP	--	--	--	--	--	--	K01674 carbonic anhydrase [EC:4.2.1.1] | (RefSeq) alpha carbonic anhydrase 7-like	http://www.genome.jp/dbget-bin/www_bget?sot:102589383	--	PREDICTED: bifunctional monodehydroascorbate reductase and carbonic anhydrase nectarin-3-like [Solanum tuberosum]
3	Novel00885	215.315	0.361026	9.2201	3.2021e-05	0.00019846	UP	779.54	200.318	1.9603	1.5334e-07	4.2522e-06	UP	809.001	0.334037	11.242	3.6816e-70	1.0977e-65	UP	GO:0050896//GO:0006950//GO:0008150//GO:0006979//GO:0055114//GO:0008152	response to stimulus//response to stress//biological_process//response to oxidative stress//oxidation-reduction process//metabolic process	--	--	GO:0020037//GO:0005515//GO:0016209//GO:0005488//GO:0016491//GO:0016684//GO:0003824//GO:1901363//GO:0097159//GO:0004601//GO:0046906//GO:0003674	heme binding//protein binding//antioxidant activity//binding//oxidoreductase activity//oxidoreductase activity, acting on peroxide as acceptor//catalytic activity//heterocyclic compound binding//organic cyclic compound binding//peroxidase activity//tetrapyrrole binding//molecular_function	K00430 peroxidase [EC:1.11.1.7] | (RefSeq) cationic peroxidase 1-like	http://www.genome.jp/dbget-bin/www_bget?sot:102593660	--	PREDICTED: cationic peroxidase 1-like [Solanum tuberosum]>gi|565399647|ref|XP_006365359.1| PREDICTED: cationic peroxidase 1-like [Solanum tuberosum]
4	Novel01703	1253.58	216.249	2.5353	0.0098086	0.029108	UP	7026.58	1162.41	2.5957	1.1154e-07	3.1982e-06	UP	7282.07	201.018	5.179	1.5586e-18	5.6675e-16	UP	--	--	--	--	GO:0003824//GO:0016740//GO:0016741//GO:0008171//GO:0003674//GO:0008168	catalytic activity//transferase activity//transferase activity, transferring one-carbon groups//O-methyltransferase activity//molecular_function//methyltransferase activity	K00588 caffeoyl-CoA O-methyltransferase [EC:2.1.1.104] | (RefSeq) CCoAMT, CCoAOMT; caffeoyl-CoA O-methyltransferase	http://www.genome.jp/dbget-bin/www_bget?sot:102586657	--	PREDICTED: caffeoyl-CoA O-methyltransferase-like [Solanum tuberosum]
5	PGSC0003DMG400000335	62.8833	8.15307	2.9473	0.0063237	0.019985	UP	217.849	58.4382	1.8983	0.0015564	0.010883	UP	225.558	7.54013	4.9028	1.614e-10	1.5778e-08	UP	GO:0055114//GO:0006807//GO:0046483//GO:0009987//GO:0009308//GO:0008150//GO:1901564//GO:0065007//GO:0065008//GO:0071704//GO:0009690//GO:0034754//GO:0006725//GO:0010817//GO:0042445//GO:0044237//GO:0008152	oxidation-reduction process//nitrogen compound metabolic process//heterocycle metabolic process//cellular process//amine metabolic process//biological_process//organonitrogen compound metabolic process//biological regulation//regulation of biological quality//organic substance metabolic process//cytokinin metabolic process//cellular hormone metabolic process//cellular aromatic compound metabolic …	--	--	GO:0005515//GO:0050660//GO:0050662//GO:0097159//GO:0046983//GO:0016491//GO:0019139//GO:0000166//GO:1901363//GO:0016645//GO:0003824//GO:0003674//GO:0048037//GO:0036094//GO:0043167//GO:1901265//GO:0016614//GO:0005488//GO:0043168	protein binding//flavin adenine dinucleotide binding//coenzyme binding//organic cyclic compound binding//protein dimerization activity//oxidoreductase activity//cytokinin dehydrogenase activity//nucleotide binding//heterocyclic compound binding//oxidoreductase activity, acting on the CH-NH group of donors//catalytic activity//molecular_function//cofactor binding//small molecule binding//ion bindi…	K00279 cytokinin dehydrogenase [EC:1.5.99.12] | (RefSeq) cytokinin oxidase/dehydrogenase 2	http://www.genome.jp/dbget-bin/www_bget?sot:102577888	-	FAD linked oxidase, N-terminal||FAD-linked oxidase-like, C-terminal||CO dehydrogenase flavoprotein-like, FAD-binding, subdomain 2||Cytokinin dehydrogenase 1, FAD/cytokinin binding domain||Myc-type, basic helix-loop-helix (bHLH) domain||FAD-binding, type 2||Vanillyl-alcohol oxidase/Cytokinin dehydrogenase C-terminal domain||FAD-binding, type 2, subdomain 1||Oxygen oxidoreductase covalent FAD-bindi…
6	PGSC0003DMG400000519	315.231	56.3623	2.4836	0.0015994	0.0061531	UP	1042.18	292.15	1.8348	6.3152e-06	0.00011013	UP	1080.21	52.2944	4.3685	9.9074e-20	4.8428e-17	UP	GO:0008150//GO:0044238//GO:0008152//GO:0005975//GO:0071704	biological_process//primary metabolic process//metabolic process//carbohydrate metabolic process//organic substance metabolic process	--	--	GO:0003824//GO:0016787//GO:0016798//GO:0004553//GO:0003674	catalytic activity//hydrolase activity//hydrolase activity, acting on glycosyl bonds//hydrolase activity, hydrolyzing O-glycosyl compounds//molecular_function	no KO assigned | (RefSeq) glucan endo-1,3-beta-glucosidase, acidic isoform GI9-like	http://www.genome.jp/dbget-bin/www_bget?sot:102595473	-	Glycoside hydrolase superfamily||Glycoside hydrolase family 17
7	PGSC0003DMG400000776	1321.01	435.858	1.5997	0.0052429	0.017003	UP	9676.43	1224.3	2.9825	0.0028306	0.017545	UP	10065.7	407.409	4.6268	0.00011184	0.0020052	UP	GO:0009664//GO:0071555//GO:0045229//GO:0071840//GO:0071554//GO:0016043//GO:0009987//GO:0008150//GO:0071669	plant-type cell wall organization//cell wall organization//external encapsulating structure organization//cellular component organization or biogenesis//cell wall organization or biogenesis//cellular component organization//cellular process//biological_process//plant-type cell wall organization or biogenesis	--	--	GO:0005198//GO:0003674//GO:0005199	structural molecule activity//molecular_function//structural constituent of cell wall	--	--	-	Extensin domain
8	PGSC0003DMG400001646	280.82	72.077	1.962	1.5593e-08	2.0713e-07	UP	540.705	260.041	1.0561	0.0037673	0.022145	UP	560.695	66.7461	3.0705	5.0033e-09	3.253e-07	UP	--	--	--	--	--	--	no KO assigned | (RefSeq) intracellular protein transport protein USO1-like	http://www.genome.jp/dbget-bin/www_bget?sot:102605466	--	--
9	PGSC0003DMG400001924	120.92	48.7876	1.3095	0.0021169	0.0078302	UP	346.92	112.053	1.6304	0.00020684	0.002078	UP	359.599	45.2821	2.9894	1.437e-08	8.3687e-07	UP	GO:0019538//GO:0044238//GO:0008150//GO:0043170//GO:0071704//GO:0006508//GO:0008152	protein metabolic process//primary metabolic process//biological_process//macromolecule metabolic process//organic substance metabolic process//proteolysis//metabolic process	GO:0031012//GO:0005575	extracellular matrix//cellular_component	GO:0046914//GO:0043169//GO:0070011//GO:0003824//GO:0003674//GO:0008233//GO:0043167//GO:0046872//GO:0008270//GO:0016787//GO:0004175//GO:0008237//GO:0004222//GO:0005488	transition metal ion binding//cation binding//peptidase activity, acting on L-amino acid peptides//catalytic activity//molecular_function//peptidase activity//ion binding//metal ion binding//zinc ion binding//hydrolase activity//endopeptidase activity//metallopeptidase activity//metalloendopeptidase activity//binding	no KO assigned | (RefSeq) metalloendoproteinase 3-MMP-like	http://www.genome.jp/dbget-bin/www_bget?sot:102592421	-	Metallopeptidase, catalytic domain||Peptidoglycan binding-like||Peptidase, metallopeptidase||Peptidase M10, metallopeptidase||Peptidase M10A, catalytic domain||Peptidase M10A
10	PGSC0003DMG400003123	13593.4	4819.99	1.4958	2.2194e-10	4.2868e-09	UP	129984	12584.6	3.3686	2.1817e-08	7.6585e-07	UP	134648	4469.98	4.9128	6.6021e-13	1.0361e-10	UP	GO:0044237//GO:0009144//GO:0046939//GO:0008152//GO:1901360//GO:0006139//GO:0072524//GO:0032787//GO:0009141//GO:0006793//GO:0042278//GO:0006753//GO:0009132//GO:0009123//GO:0071704//GO:0009117//GO:0019362//GO:0006096//GO:0006725//GO:0016310//GO:0009161//GO:0046496//GO:0005975//GO:0055086//GO:0016052//GO:0046034//GO:0006163//GO:0009126//GO:0006091//GO:0009116//GO:0072521//GO:1901135//GO:0009119//GO:…	cellular metabolic process//purine nucleoside triphosphate metabolic process//nucleotide phosphorylation//metabolic process//organic cyclic compound metabolic process//nucleobase-containing compound metabolic process//pyridine-containing compound metabolic process//monocarboxylic acid metabolic process//nucleoside triphosphate metabolic process//phosphorus metabolic process//purine nucleoside met…	--	--	GO:0016829//GO:0016832//GO:0004332//GO:0003674//GO:0003824//GO:0016830	lyase activity//aldehyde-lyase activity//fructose-bisphosphate aldolase activity//molecular_function//catalytic activity//carbon-carbon lyase activity	K01623 fructose-bisphosphate aldolase, class I [EC:4.1.2.13] | (RefSeq) plastidic aldolase	http://www.genome.jp/dbget-bin/www_bget?sot:102577738	-	Fructose-bisphosphate aldolase, class-I||Aldolase-type TIM barrel||Fructose-bisphosphate aldolase class-I active site
11	PGSC0003DMG400003534	61.7069	22.7675	1.4385	0.014125	0.039661	UP	134.476	57.106	1.2356	0.0058943	0.031609	UP	139.531	21.1104	2.7246	9.647e-07	3.4614e-05	UP	GO:0055085//GO:0051179//GO:0009987//GO:0051234//GO:0006810//GO:0008150	transmembrane transport//localization//cellular process//establishment of localization//transport//biological_process	GO:0044422//GO:0016021//GO:0043229//GO:0044446//GO:0005575//GO:0009526//GO:0043231//GO:0044435//GO:0016020//GO:0043227//GO:0044424//GO:0005737//GO:0009507//GO:0044425//GO:0005622//GO:0009941//GO:0044464//GO:0043226//GO:0031224//GO:0031975//GO:0031967//GO:0044434//GO:0009536//GO:0044444//GO:0005623	organelle part//integral component of membrane//intracellular organelle//intracellular organelle part//cellular_component//plastid envelope//intracellular membrane-bounded organelle//plastid part//membrane//membrane-bounded organelle//intracellular part//cytoplasm//chloroplast//membrane part//intracellular//chloroplast envelope//cell part//organelle//intrinsic component of membrane//envelope//org…	--	--	K15115 solute carrier family 25 (mitochondrial folate transporter), member 32 | (RefSeq) folate transporter 1, chloroplastic	http://www.genome.jp/dbget-bin/www_bget?sot:102596943	ATFOLT1	Mitochondrial carrier domain||Mitochondrial carrier protein||Mitochondrial substrate/solute carrier
12	PGSC0003DMG400003754	33.6609	1.94681	4.1119	4.1816e-05	0.0002512	UP	302.488	31.1568	3.2793	3.5119e-06	6.6153e-05	UP	314.179	1.81744	7.4335	1.2458e-13	2.2243e-11	UP	GO:0044237//GO:0008152//GO:0042445//GO:0010817//GO:0071704//GO:0034754//GO:0009690//GO:0006725//GO:0065008//GO:0009308//GO:0065007//GO:1901564//GO:0008150//GO:0046483//GO:0009987//GO:0006807//GO:0055114	cellular metabolic process//metabolic process//hormone metabolic process//regulation of hormone levels//organic substance metabolic process//cellular hormone metabolic process//cytokinin metabolic process//cellular aromatic compound metabolic process//regulation of biological quality//amine metabolic process//biological regulation//organonitrogen compound metabolic process//biological_process//he…	--	--	GO:0043168//GO:0005488//GO:0016614//GO:1901265//GO:0043167//GO:0036094//GO:0048037//GO:0003674//GO:1901363//GO:0016645//GO:0000166//GO:0003824//GO:0016491//GO:0019139//GO:0050662//GO:0050660//GO:0097159	anion binding//binding//oxidoreductase activity, acting on CH-OH group of donors//nucleoside phosphate binding//ion binding//small molecule binding//cofactor binding//molecular_function//heterocyclic compound binding//oxidoreductase activity, acting on the CH-NH group of donors//nucleotide binding//catalytic activity//oxidoreductase activity//cytokinin dehydrogenase activity//coenzyme binding//fl…	K00279 cytokinin dehydrogenase [EC:1.5.99.12] | (RefSeq) CKX4; cytokinin oxidase/dehydrogenase	http://www.genome.jp/dbget-bin/www_bget?sot:102577731	CKX5	CO dehydrogenase flavoprotein-like, FAD-binding, subdomain 2||Cytokinin dehydrogenase 1, FAD/cytokinin binding domain||FAD-binding, type 2||FAD linked oxidase, N-terminal||FAD-linked oxidase-like, C-terminal||Oxygen oxidoreductase covalent FAD-binding site||Vanillyl-alcohol oxidase/Cytokinin dehydrogenase C-terminal domain||FAD-binding, type 2, subdomain 1
13	PGSC0003DMG400003993	2511.12	504.75	2.3147	0.0002637	0.0012882	UP	6132.02	2329.84	1.3961	0.00182	0.012382	UP	6368.81	466.426	3.7713	7.5562e-11	7.8631e-09	UP	--	--	--	--	--	--	no KO assigned | (RefSeq) citrate-binding protein-like	http://www.genome.jp/dbget-bin/www_bget?sot:102594787	-	Alginate lyase 2||Concanavalin A-like lectin/glucanase domain
14	PGSC0003DMG400005284	1141.6	91.4768	3.6415	3.7551e-05	0.0002284	UP	2947.5	1059.35	1.4763	0.00010469	0.0011695	UP	3053.98	84.3805	5.1776	2.8686e-29	4.2766e-26	UP	GO:0008150//GO:0055114//GO:0008152	biological_process//oxidation-reduction process//metabolic process	--	--	GO:0016491//GO:0003855//GO:0003824//GO:0016836//GO:0016829//GO:0003674//GO:0016616//GO:0004764//GO:0016835//GO:0016614	oxidoreductase activity//3-dehydroquinate dehydratase activity//catalytic activity//hydro-lyase activity//lyase activity//molecular_function//oxidoreductase activity, acting on the CH-OH group of donors, NAD or NADP as acceptor//shikimate 3-dehydrogenase (NADP+) activity//carbon-oxygen lyase activity//oxidoreductase activity, acting on CH-OH group of donors	K13832 3-dehydroquinate dehydratase / shikimate dehydrogenase [EC:4.2.1.10 1.1.1.25] | (RefSeq) bifunctional 3-dehydroquinate dehydratase/shikimate dehydrogenase, chloroplastic-like	http://www.genome.jp/dbget-bin/www_bget?sot:102578356	-	3-dehydroquinate dehydratase type I||Shikimate dehydrogenase family||Shikimate dehydrogenase substrate binding, N-terminal||NAD(P)-binding domain||Aldolase-type TIM barrel
15	PGSC0003DMG400005928	23.5822	0	Inf	0.0013169	0.0052012	UP	171.677	21.8568	2.9735	2.848e-08	9.589e-07	UP	178.012	0	Inf	1.7458e-23	1.6174e-20	UP	GO:0019538//GO:0036211//GO:0009987//GO:0044238//GO:0008150//GO:0016567//GO:0043412//GO:0070647//GO:0044267//GO:0006464//GO:0044260//GO:0043170//GO:0071704//GO:0032446//GO:0044237//GO:0008152	protein metabolic process//protein modification process//cellular process//primary metabolic process//biological_process//protein ubiquitination//macromolecule modification//protein modification by small protein conjugation or removal//cellular protein metabolic process//cellular protein modification process//cellular macromolecule metabolic process//macromolecule metabolic process//organic subst…	--	--	GO:0004842//GO:0016740//GO:0003824//GO:0003674//GO:0019787	ubiquitin-protein transferase activity//transferase activity//catalytic activity//molecular_function//ubiquitin-like protein transferase activity	no KO assigned | (RefSeq) E3 ubiquitin-protein ligase PUB24-like	http://www.genome.jp/dbget-bin/www_bget?sot:102603572	-	Armadillo-type fold||U box domain||Zinc finger, RING/FYVE/PHD-type||Armadillo-like helical
16	PGSC0003DMG400006995	2987.83	636.017	2.232	0.0027706	0.0098666	UP	8093.32	2772.72	1.5454	0.0051901	0.028609	UP	8382.87	589.505	3.8299	1.1217e-08	6.7027e-07	UP	--	--	--	--	--	--	no KO assigned | (RefSeq) uncharacterized LOC102593878	http://www.genome.jp/dbget-bin/www_bget?sot:102593878	-	Histidine phosphatase superfamily, clade-1||PRIB5||Histidine phosphatase superfamily
17	PGSC0003DMG400007375	275.587	51.7552	2.4127	6.9132e-05	0.00039355	UP	642.421	255.568	1.3298	0.00026137	0.0025395	UP	665.636	47.8676	3.7976	9.2844e-18	3.0759e-15	UP	GO:0036211//GO:0044238//GO:0009987//GO:0019538//GO:0044267//GO:0043412//GO:0006091//GO:0018298//GO:0019684//GO:0008150//GO:0071704//GO:0043170//GO:0044260//GO:0006464//GO:0009765//GO:0044237//GO:0008152//GO:0015979	protein modification process//primary metabolic process//cellular process//protein metabolic process//cellular protein metabolic process//macromolecule modification//generation of precursor metabolites and energy//protein-chromophore linkage//photosynthesis, light reaction//biological_process//organic substance metabolic process//macromolecule metabolic process//cellular macromolecule metabolic p…	GO:0043226//GO:0044464//GO:0031224//GO:0034357//GO:0005622//GO:0009579//GO:0009536//GO:0009521//GO:0044436//GO:0009534//GO:0005623//GO:0044444//GO:0031976//GO:0009523//GO:0098796//GO:0009522//GO:0044434//GO:0032991//GO:0043227//GO:0009535//GO:0016020//GO:0044435//GO:0031984//GO:0043229//GO:0044446//GO:0044422//GO:0016021//GO:0043231//GO:0005575//GO:0055035//GO:0044424//GO:0009507//GO:0044425//GO:…	organelle//cell part//intrinsic component of membrane//photosynthetic membrane//intracellular//thylakoid//plastid//photosystem//thylakoid part//chloroplast thylakoid//cell//cytoplasmic part//plastid thylakoid//photosystem II//membrane protein complex//photosystem I//chloroplast part//protein-containing complex//membrane-bounded organelle//chloroplast thylakoid membrane//membrane//plastid part//or…	GO:0097159//GO:1901363//GO:0016168//GO:0003674//GO:0046906//GO:0005488	organic cyclic compound binding//heterocyclic compound binding//chlorophyll binding//molecular_function//tetrapyrrole binding//binding	K08912 light-harvesting complex II chlorophyll a/b binding protein 1 | (RefSeq) chlorophyll a-b binding protein 3C, chloroplastic-like	http://www.genome.jp/dbget-bin/www_bget?sot:102598575	-	Chlorophyll A-B binding protein||Chlorophyll a/b binding protein domain||Chlorophyll A-B binding protein, plant
18	PGSC0003DMG400008120	476.634	178.081	1.4203	0.0048768	0.015987	UP	900.866	441.637	1.0285	0.0067974	0.035415	UP	935.789	165.412	2.5001	1.5109e-06	5.0448e-05	UP	GO:0030001//GO:0008150//GO:0051234//GO:0006810//GO:0051179//GO:0006811//GO:0006812	metal ion transport//biological_process//establishment of localization//transport//localization//ion transport//cation transport	--	--	GO:0043169//GO:0005488//GO:0046872//GO:0043167//GO:0003674	cation binding//binding//metal ion binding//ion binding//molecular_function	no KO assigned | (RefSeq) uncharacterized LOC102597591	http://www.genome.jp/dbget-bin/www_bget?sot:102597591	-	Heavy metal-associated domain, HMA
19	PGSC0003DMG400008639	109.061	40.7436	1.4205	0.017985	0.048743	UP	542.189	100.783	2.4275	0.00011907	0.0013069	UP	561.547	37.7775	3.8938	1.4658e-07	6.7342e-06	UP	GO:0006091//GO:0009767//GO:0019684//GO:0009773//GO:0044238//GO:0044237//GO:0008150//GO:0009987//GO:0055114//GO:0015979//GO:0008152//GO:0071704//GO:0022900//GO:0005975	generation of precursor metabolites and energy//photosynthetic electron transport chain//photosynthesis, light reaction//photosynthetic electron transport in photosystem I//primary metabolic process//cellular metabolic process//biological_process//cellular process//oxidation-reduction process//photosynthesis//metabolic process//organic substance metabolic process//electron transport chain//carboh…	GO:0009534//GO:0010598//GO:0044444//GO:0005623//GO:0044434//GO:0044464//GO:0005622//GO:0044425//GO:0055035//GO:0044424//GO:0042651//GO:0009535//GO:0044435//GO:0043229//GO:0044446//GO:0044422//GO:0044436//GO:0009536//GO:0031976//GO:0098796//GO:0043226//GO:0034357//GO:0009579//GO:0009507//GO:0005737//GO:0016020//GO:0043227//GO:0031984//GO:0032991//GO:0043231//GO:0005575	chloroplast thylakoid//NAD(P)H dehydrogenase complex (plastoquinone)//cytoplasmic part//cell//chloroplast part//cell part//intracellular//membrane part//plastid thylakoid membrane//intracellular part//thylakoid membrane//chloroplast thylakoid membrane//plastid part//intracellular organelle//intracellular organelle part//organelle part//thylakoid part//plastid//plastid thylakoid//membrane protein …	GO:0005488//GO:0003824//GO:0030246//GO:0003674	binding//catalytic activity//carbohydrate binding//molecular_function	no KO assigned | (RefSeq) photosynthetic NDH subunit of subcomplex B 2, chloroplastic	http://www.genome.jp/dbget-bin/www_bget?sot:102593344	NDF2	Galactose mutarotase-like domain||-||Glycoside hydrolase-type carbohydrate-binding
20	PGSC0003DMG400008882	1071.92	435.391	1.2998	4.4901e-05	0.00026757	UP	2070.56	993.052	1.0601	4.3804e-06	7.9892e-05	UP	2148.12	403.818	2.4113	9.3163e-17	2.671e-14	UP	--	--	--	--	--	--	no KO assigned | (RefSeq) IQ domain-containing protein IQM3-like	http://www.genome.jp/dbget-bin/www_bget?sot:102605016	--	--
21	PGSC0003DMG400009472	318.599	36.2681	3.135	1.3644e-17	8.1958e-16	UP	1406.37	294.833	2.254	1.0165e-11	7.9605e-10	UP	1458.85	33.7405	5.4342	5.1409e-33	1.3935e-29	UP	GO:0006165//GO:0043436//GO:0046483//GO:0044238//GO:0046031//GO:0009205//GO:0009179//GO:0051186//GO:0009167//GO:0009150//GO:1901575//GO:0006807//GO:0009119//GO:1901135//GO:0019752//GO:0006091//GO:0009116//GO:0072521//GO:0006732//GO:0009259//GO:0009135//GO:0019693//GO:0034641//GO:0016310//GO:0006096//GO:0019362//GO:0009161//GO:0044237//GO:0072524//GO:0006139//GO:1901360//GO:0042278//GO:0006753//GO:…	nucleoside diphosphate phosphorylation//oxoacid metabolic process//heterocycle metabolic process//primary metabolic process//ADP metabolic process//purine ribonucleoside triphosphate metabolic process//purine ribonucleoside diphosphate metabolic process//cofactor metabolic process//purine ribonucleoside monophosphate metabolic process//purine ribonucleotide metabolic process//organic substance ca…	--	--	GO:0016868//GO:0004619//GO:0016866//GO:0003824//GO:0003674//GO:0016853	intramolecular transferase activity, phosphotransferases//phosphoglycerate mutase activity//intramolecular transferase activity//catalytic activity//molecular_function//isomerase activity	K01834 2,3-bisphosphoglycerate-dependent phosphoglycerate mutase [EC:5.4.2.11] | (RefSeq) 2,3-bisphosphoglycerate-dependent phosphoglycerate mutase	http://www.genome.jp/dbget-bin/www_bget?sot:102578340	-	Histidine phosphatase superfamily, clade-1||Phosphoglycerate mutase 1||Histidine phosphatase superfamily||Phosphoglycerate/bisphosphoglycerate mutase, active site
22	PGSC0003DMG400009921	27.3663	5.97673	2.195	0.017562	0.047729	UP	76.5301	25.3356	1.5949	0.0042044	0.024136	UP	79.3288	5.47841	3.856	3.5553e-07	1.4622e-05	UP	GO:0008150//GO:0071704//GO:0008152//GO:0006508//GO:0044238//GO:0019538//GO:0043170	biological_process//organic substance metabolic process//metabolic process//proteolysis//primary metabolic process//protein metabolic process//macromolecule metabolic process	--	--	GO:0070011//GO:0003824//GO:0003674//GO:0008234//GO:0016787//GO:0008233	peptidase activity, acting on L-amino acid peptides//catalytic activity//molecular_function//cysteine-type peptidase activity//hydrolase activity//peptidase activity	K16290 xylem cysteine proteinase [EC:3.4.22.-] | (RefSeq) xylem cysteine proteinase 1	http://www.genome.jp/dbget-bin/www_bget?sot:102580817	-	Peptidase C1A||Cathepsin propeptide inhibitor domain (I29)||Cysteine peptidase, cysteine active site||Cysteine peptidase, asparagine active site||Peptidase C1A, papain C-terminal
23	PGSC0003DMG400010471	95.7024	20.3098	2.2364	0.0013236	0.005223	UP	452.511	88.7178	2.3507	0.0045327	0.025707	UP	470.185	18.8741	4.6388	1.963e-05	0.00046712	UP	GO:0019538//GO:0044238//GO:0043170//GO:0008150//GO:0071704//GO:0006508//GO:0008152	protein metabolic process//primary metabolic process//macromolecule metabolic process//biological_process//organic substance metabolic process//proteolysis//metabolic process	--	--	GO:0008233//GO:0070011//GO:0017171//GO:0003824//GO:0003674//GO:0008236//GO:0004175//GO:0016787//GO:0004252	peptidase activity//peptidase activity, acting on L-amino acid peptides//serine hydrolase activity//catalytic activity//molecular_function//serine-type peptidase activity//endopeptidase activity//hydrolase activity//serine-type endopeptidase activity	no KO assigned | (RefSeq) subtilisin-like protease SBT1.7	http://www.genome.jp/dbget-bin/www_bget?sot:102605676	-	Cucumisin-like catalytic domain||Peptidase S8, subtilisin, Ser-active site||Peptidase S8, subtilisin, His-active site||Peptidase S8/S53 domain||Peptidase S8 propeptide/proteinase inhibitor I9||Peptidase S8, subtilisin-related
24	PGSC0003DMG400012224	105.976	20.1054	2.3981	0.00024673	0.0012166	UP	709.155	98.0863	2.854	3.5577e-08	1.1756e-06	UP	734.714	18.6811	5.2975	4.6276e-17	1.3798e-14	UP	--	--	--	--	GO:0003674//GO:0009055//GO:0051540//GO:0005488//GO:0051536	molecular_function//electron transfer activity//metal cluster binding//binding//iron-sulfur cluster binding	no KO assigned | (RefSeq) photosynthetic NDH subunit of subcomplex B 3, chloroplastic	http://www.genome.jp/dbget-bin/www_bget?sot:102582039	NDF4	Beta-grasp domain||2Fe-2S ferredoxin-type iron-sulfur binding domain
25	PGSC0003DMG400012522	3397.41	1629.58	1.0599	0.00895	0.026899	UP	8554.21	3151.48	1.4406	1.2963e-10	7.9589e-09	UP	8869.15	1509.37	2.5548	8.2201e-21	4.7134e-18	UP	GO:0071704//GO:0006066//GO:1901576//GO:0008152//GO:0016125//GO:0044281//GO:1901362//GO:0009987//GO:0006720//GO:0008610//GO:0044283//GO:0006694//GO:0008150//GO:0044249//GO:0044255//GO:0046165//GO:0016126//GO:0044237//GO:1901360//GO:0008299//GO:0044238//GO:0009058//GO:1901617//GO:1901615//GO:0008202//GO:0006629	organic substance metabolic process//alcohol metabolic process//organic substance biosynthetic process//metabolic process//sterol metabolic process//small molecule metabolic process//organic cyclic compound biosynthetic process//cellular process//isoprenoid metabolic process//lipid biosynthetic process//small molecule biosynthetic process//steroid biosynthetic process//biological_process//cellula…	--	--	GO:0003674//GO:0016746//GO:0004421//GO:0003824//GO:0016740//GO:0046912	molecular_function//transferase activity, transferring acyl groups//hydroxymethylglutaryl-CoA synthase activity//catalytic activity//transferase activity//transferase activity, transferring acyl groups, acyl groups converted into alkyl on transfer	K01641 hydroxymethylglutaryl-CoA synthase [EC:2.3.3.10] | (RefSeq) hydroxymethylglutaryl-CoA synthase-like	http://www.genome.jp/dbget-bin/www_bget?sot:102584775	-	Hydroxymethylglutaryl-CoA synthase, eukaryotic||Hydroxymethylglutaryl-coenzyme A synthase C-terminal domain||Thiolase-like||Hydroxymethylglutaryl-coenzyme A synthase, active site||Hydroxymethylglutaryl-coenzyme A synthase, N-terminal
26	PGSC0003DMG400012589	1470.96	397.2	1.8888	0.00011874	0.00063413	UP	11516.1	1363.89	3.0778	9.5468e-39	4.7476e-35	UP	11944.1	369.734	5.0137	3.4785e-60	5.1859e-56	UP	GO:0009987//GO:0044248//GO:0055114//GO:0009056//GO:0006979//GO:0008150//GO:0042744//GO:0008152//GO:0042743//GO:0050896//GO:0072593//GO:0044237//GO:0006950	cellular process//cellular catabolic process//oxidation-reduction process//catabolic process//response to oxidative stress//biological_process//hydrogen peroxide catabolic process//metabolic process//hydrogen peroxide metabolic process//response to stimulus//reactive oxygen species metabolic process//cellular metabolic process//response to stress	GO:0005575//GO:0005576	cellular_component//extracellular region	GO:0097159//GO:1901363//GO:0003824//GO:0016684//GO:0016491//GO:0043167//GO:0003674//GO:0004601//GO:0046906//GO:0043169//GO:0016209//GO:0020037//GO:0046872//GO:0005488	organic cyclic compound binding//heterocyclic compound binding//catalytic activity//oxidoreductase activity, acting on peroxide as acceptor//oxidoreductase activity//ion binding//molecular_function//peroxidase activity//tetrapyrrole binding//cation binding//antioxidant activity//heme binding//metal ion binding//binding	K00430 peroxidase [EC:1.11.1.7] | (RefSeq) CEVI16; peroxidase N1	http://www.genome.jp/dbget-bin/www_bget?sot:102585502	-	Secretory peroxidase||Haem peroxidase, plant/fungal/bacterial||Peroxidase, active site||Haem peroxidase||Plant peroxidase||Peroxidases heam-ligand binding site
27	PGSC0003DMG400013176	61.3672	10.432	2.5565	5.7389e-05	0.00033361	UP	246.557	56.9535	2.1141	8.2107e-06	0.00013679	UP	255.399	9.7004	4.7186	7.6612e-15	1.6317e-12	UP	--	--	--	--	--	--	no KO assigned | (RefSeq) cysteine-rich repeat secretory protein 38-like	http://www.genome.jp/dbget-bin/www_bget?sot:102586615	-	Gnk2-homologous domain
28	PGSC0003DMG400013481	375.949	44.4298	3.0809	8.4046e-19	6.0269e-17	UP	751.078	348.233	1.1089	0.0003635	0.003326	UP	778.441	41.1568	4.2414	2.3282e-19	1.068e-16	UP	--	--	GO:0016020//GO:0005575//GO:0031224//GO:0016021//GO:0044425	membrane//cellular_component//intrinsic component of membrane//integral component of membrane//membrane part	GO:0003824//GO:0016740//GO:0003674//GO:0016757//GO:0003950//GO:0016763	catalytic activity//transferase activity//molecular_function//transferase activity, transferring glycosyl groups//NAD+ ADP-ribosyltransferase activity//transferase activity, transferring pentosyl groups	no KO assigned | (RefSeq) probable inactive poly [ADP-ribose] polymerase SRO2	http://www.genome.jp/dbget-bin/www_bget?sot:102589049	-	Poly(ADP-ribose) polymerase, catalytic domain||RST domain of plant C-terminal
29	PGSC0003DMG400013485	283.11	26.4942	3.4176	0.0012661	0.005027	UP	1561.16	263.093	2.569	1.0967e-09	5.5089e-08	UP	1619.52	24.6004	6.0407	1.7842e-29	2.9556e-26	UP	--	--	--	--	GO:0005488//GO:0032559//GO:0032549//GO:0043168//GO:0017076//GO:0097367//GO:1901265//GO:0001882//GO:0000166//GO:0001883//GO:0035639//GO:0032555//GO:0032550//GO:0032553//GO:0005524//GO:0003674//GO:0036094//GO:0043167//GO:1901363//GO:0030554//GO:0003824//GO:0097159	binding//adenyl ribonucleotide binding//ribonucleoside binding//anion binding//purine nucleotide binding//carbohydrate derivative binding//nucleoside phosphate binding//nucleoside binding//nucleotide binding//purine nucleoside binding//purine ribonucleoside triphosphate binding//purine ribonucleotide binding//purine ribonucleoside binding//ribonucleotide binding//ATP binding//molecular_function//…	K01648 ATP citrate (pro-S)-lyase [EC:2.3.3.8] | (RefSeq) ATP-citrate synthase alpha chain protein 2-like	http://www.genome.jp/dbget-bin/www_bget?sot:102585745	-	ATP-grasp fold, subdomain 1||Succinyl-CoA synthetase-like||ATP-citrate synthase, citrate-binding domain||ATP-grasp fold, succinyl-CoA synthetase-type
30	PGSC0003DMG400014555	201.384	95.4674	1.0769	0.0030614	0.01074	UP	1034.89	186.43	2.4728	0.00069508	0.0057103	UP	1072.28	88.4273	3.6	1.5131e-05	0.00037317	UP	--	--	GO:0005575//GO:0016020//GO:0031224//GO:0044425//GO:0016021	cellular_component//membrane//intrinsic component of membrane//membrane part//integral component of membrane	GO:0016740//GO:0003824//GO:0008194//GO:0003674//GO:0016757//GO:0008375//GO:0016758	transferase activity//catalytic activity//UDP-glycosyltransferase activity//molecular_function//transferase activity, transferring glycosyl groups//acetylglucosaminyltransferase activity//transferase activity, transferring hexosyl groups	no KO assigned | (RefSeq) uncharacterized LOC102583596	http://www.genome.jp/dbget-bin/www_bget?sot:102583596	-	Glycosyl transferase, family 14
31	PGSC0003DMG400014874	12.2702	0	Inf	0.0024225	0.0088041	UP	190.822	11.3454	4.072	1.1108e-09	5.5611e-08	UP	197.958	0	Inf	2.7203e-19	1.2114e-16	UP	--	--	--	--	--	--	--	--	--	--
32	PGSC0003DMG400015190	582.124	106.723	2.4474	0.0017098	0.0065161	UP	1417.32	540.585	1.3906	2.7634e-08	9.3558e-07	UP	1470.34	98.6823	3.8972	6.6357e-34	1.9786e-30	UP	GO:0009694//GO:0019752//GO:0009695//GO:0009058//GO:0043436//GO:0044237//GO:0016053//GO:0046394//GO:0044249//GO:0008150//GO:0044283//GO:0006082//GO:0072330//GO:0009987//GO:0044281//GO:0032787//GO:0008152//GO:1901576//GO:0071704	jasmonic acid metabolic process//carboxylic acid metabolic process//jasmonic acid biosynthetic process//biosynthetic process//oxoacid metabolic process//cellular metabolic process//organic acid biosynthetic process//carboxylic acid biosynthetic process//cellular biosynthetic process//biological_process//small molecule biosynthetic process//organic acid metabolic process//monocarboxylic acid biosy…	GO:0005623//GO:0044444//GO:0005622//GO:0044464//GO:0042579//GO:0044424//GO:0043229//GO:0043226//GO:0005737//GO:0005575//GO:0043231//GO:0005777//GO:0043227	cell//cytoplasmic part//intracellular//cell part//microbody//intracellular part//intracellular organelle//organelle//cytoplasm//cellular_component//intracellular membrane-bounded organelle//peroxisome//membrane-bounded organelle	GO:0016747//GO:0016740//GO:0003824//GO:0016746//GO:0016408//GO:0003674//GO:0004321	transferase activity, transferring acyl groups other than amino-acyl groups//transferase activity//catalytic activity//transferase activity, transferring acyl groups//C-acyltransferase activity//molecular_function//fatty-acyl-CoA synthase activity	no KO assigned | (RefSeq) 4-coumarate--CoA ligase-like 9	http://www.genome.jp/dbget-bin/www_bget?sot:102588483	-	AMP-binding, conserved site||AMP-binding enzyme, C-terminal domain||AMP-dependent synthetase/ligase
33	PGSC0003DMG400015607	27.6289	5.32583	2.3751	0.0079363	0.024288	UP	75.2022	25.6545	1.5516	0.0097635	0.047018	UP	77.9243	4.91289	3.9874	2.7153e-07	1.1484e-05	UP	GO:0008152//GO:0008150	metabolic process//biological_process	--	--	GO:0003674//GO:0016787//GO:0003824	molecular_function//hydrolase activity//catalytic activity	K14664 IAA-amino acid hydrolase [EC:3.5.1.-] | (RefSeq) IAA-amino acid hydrolase ILR1-like 2	http://www.genome.jp/dbget-bin/www_bget?sot:102601526	-	Peptidase M20||Amidohydrolase||Peptidase M20, dimerisation domain
34	PGSC0003DMG400016121	23.7626	0.612381	5.2781	0.016028	0.044189	UP	81.0642	22.007	1.8811	0.00073401	0.0059726	UP	84.1974	0.574682	7.1949	8.2909e-13	1.2743e-10	UP	GO:0008152//GO:0008150	metabolic process//biological_process	--	--	GO:0016758//GO:0016757//GO:0003674//GO:0003824//GO:0016740	transferase activity, transferring hexosyl groups//transferase activity, transferring glycosyl groups//molecular_function//catalytic activity//transferase activity	no KO assigned | (RefSeq) UDP-glycosyltransferase 91A1-like	http://www.genome.jp/dbget-bin/www_bget?sot:102600168	-	UDP-glucuronosyl/UDP-glucosyltransferase
35	PGSC0003DMG400016168	1035.4	383.447	1.4331	3.7733e-08	4.6148e-07	UP	2626.87	959.426	1.4531	8.5797e-09	3.364e-07	UP	2727.01	355.736	2.9384	4.4275e-19	1.8594e-16	UP	GO:0044238//GO:0046483//GO:0043436//GO:0051186//GO:0043603//GO:0006807//GO:0019752//GO:0006732//GO:0034641//GO:0006760//GO:0000096//GO:0042558//GO:0044237//GO:0046653//GO:1901360//GO:0009987//GO:0006790//GO:0044281//GO:0006082//GO:0009066//GO:0055114//GO:0006555//GO:1901564//GO:0008150//GO:0071704//GO:1901605//GO:0006725//GO:0006730//GO:0006520//GO:0006575//GO:0035999//GO:0008152	primary metabolic process//heterocycle metabolic process//oxoacid metabolic process//cofactor metabolic process//cellular amide metabolic process//nitrogen compound metabolic process//carboxylic acid metabolic process//coenzyme metabolic process//cellular nitrogen compound metabolic process//folic acid-containing compound metabolic process//sulfur amino acid metabolic process//pteridine-containin…	--	--	GO:0004489//GO:0016646//GO:0016645//GO:0003824//GO:0016491//GO:0003674	methylenetetrahydrofolate reductase (NAD(P)H) activity//oxidoreductase activity, acting on the CH-NH group of donors, NAD or NADP as acceptor//oxidoreductase activity, acting on the CH-NH group of donors//catalytic activity//oxidoreductase activity//molecular_function	K00297 methylenetetrahydrofolate reductase (NADPH) [EC:1.5.1.20] | (RefSeq) methylenetetrahydrofolate reductase 2-like	http://www.genome.jp/dbget-bin/www_bget?sot:102598073	-	Methylenetetrahydrofolate reductase||Eukaryotic-type methylenetetrahydrofolate reductase||FAD-linked oxidoreductase-like
36	PGSC0003DMG400016193	45.3139	10.6731	2.086	0.0035202	0.012118	UP	154.108	42.0038	1.8754	0.0051581	0.028475	UP	160.145	9.88355	4.0182	1.2211e-05	0.00031199	UP	GO:0008152//GO:0008150	metabolic process//biological_process	--	--	GO:0003674//GO:0016757//GO:0003824//GO:0016740//GO:0016758	molecular_function//transferase activity, transferring glycosyl groups//catalytic activity//transferase activity//transferase activity, transferring hexosyl groups	no KO assigned | (RefSeq) UDP-glycosyltransferase 91A1-like	http://www.genome.jp/dbget-bin/www_bget?sot:102599831	-	UDP-glucuronosyl/UDP-glucosyltransferase
37	PGSC0003DMG400016725	446.961	129.858	1.7832	3.9693e-05	0.00023956	UP	961.329	414.41	1.214	0.00014924	0.0015889	UP	997.572	120.587	3.0483	2.2797e-12	3.2523e-10	UP	--	--	--	--	--	--	no KO assigned | (RefSeq) uncharacterized LOC102583526	http://www.genome.jp/dbget-bin/www_bget?sot:102583526	--	--
38	PGSC0003DMG400017119	72.9349	11.1482	2.7098	2.0272e-05	0.00013167	UP	336.503	67.4593	2.3185	0.0091135	0.04452	UP	348.089	10.3087	5.0775	1.2454e-05	0.00031739	UP	GO:0008150//GO:0008152	biological_process//metabolic process	--	--	GO:0016758//GO:0016740//GO:0003824//GO:0003674//GO:0016757	transferase activity, transferring hexosyl groups//transferase activity//catalytic activity//molecular_function//transferase activity, transferring glycosyl groups	K13496 UDP-glucosyl transferase 73C [EC:2.4.1.-] | (RefSeq) UDP-glycosyltransferase 73C3-like	http://www.genome.jp/dbget-bin/www_bget?sot:102603165	-	UDP-glucuronosyl/UDP-glucosyltransferase||UDP-glycosyltransferase family, conserved site
39	PGSC0003DMG400017233	92.8192	35.806	1.3742	0.012765	0.036424	UP	483.006	86.053	2.4887	6.9749e-06	0.0001194	UP	501.498	33.0623	3.923	1.3006e-09	9.7436e-08	UP	GO:0090304//GO:0044238//GO:0046483//GO:0009058//GO:0006807//GO:0010467//GO:0060255//GO:0010556//GO:0034654//GO:0050794//GO:0018130//GO:0032774//GO:0010468//GO:0065007//GO:0016070//GO:0034641//GO:0019222//GO:0043170//GO:0009059//GO:0019219//GO:0044237//GO:0044271//GO:1901360//GO:0006139//GO:1901362//GO:0080090//GO:0009987//GO:0051171//GO:0019438//GO:2000112//GO:0008150//GO:0031326//GO:0006355//GO:…	nucleic acid metabolic process//primary metabolic process//heterocycle metabolic process//biosynthetic process//nitrogen compound metabolic process//gene expression//regulation of macromolecule metabolic process//regulation of macromolecule biosynthetic process//nucleobase-containing compound biosynthetic process//regulation of cellular process//heterocycle biosynthetic process//RNA biosynthetic …	GO:0044464//GO:0005634//GO:0005622//GO:0005623//GO:0043229//GO:0044424//GO:0043226//GO:0043227//GO:0043231//GO:0005575	cell part//nucleus//intracellular//cell//intracellular organelle//intracellular part//organelle//membrane-bounded organelle//intracellular membrane-bounded organelle//cellular_component	GO:0003677//GO:0005488//GO:0097159//GO:1901363//GO:0003676//GO:0003700//GO:0003674	DNA binding//binding//organic cyclic compound binding//heterocyclic compound binding//nucleic acid binding//DNA-binding transcription factor activity//molecular_function	no KO assigned | (RefSeq) ethylene-responsive transcription factor ERF096-like	http://www.genome.jp/dbget-bin/www_bget?sot:102593271	-	AP2/ERF domain||AP2/ERF transcription factor ERF/PTI6||DNA-binding domain
40	PGSC0003DMG400017432	3155.88	841.248	1.9074	0.018224	0.049271	UP	23417.4	2925.98	3.0006	0.0039076	0.022817	UP	24252.9	778.738	4.9609	4.8388e-05	0.00099984	UP	GO:0051179//GO:0055085//GO:0009987//GO:0051234//GO:0006810//GO:0008150	localization//transmembrane transport//cellular process//establishment of localization//transport//biological_process	GO:0031224//GO:0016021//GO:0044425//GO:0016020//GO:0005575	intrinsic component of membrane//integral component of membrane//membrane part//membrane//cellular_component	GO:0022804//GO:0005215//GO:0042626//GO:0017111//GO:0000166//GO:0016887//GO:0001883//GO:0001882//GO:0097367//GO:1901265//GO:0017076//GO:0015405//GO:0043168//GO:0042623//GO:0005488//GO:0016817//GO:0032549//GO:0032559//GO:0016462//GO:0097159//GO:0043492//GO:1901363//GO:0003824//GO:0030554//GO:0022857//GO:0043167//GO:0015399//GO:0016818//GO:0036094//GO:0003674//GO:0005524//GO:0032553//GO:0032555//GO:…	active transmembrane transporter activity//transporter activity//ATPase activity, coupled to transmembrane movement of substances//nucleoside-triphosphatase activity//nucleotide binding//ATPase activity//purine nucleoside binding//nucleoside binding//carbohydrate derivative binding//nucleoside phosphate binding//purine nucleotide binding//P-P-bond-hydrolysis-driven transmembrane transporter activ…	no KO assigned | (RefSeq) putative ABC transporter C family member 15	http://www.genome.jp/dbget-bin/www_bget?sot:102589832	-	AAA+ ATPase domain||ABC transporter, conserved site||ABC transporter type 1, transmembrane domain||ABC transporter-like||P-loop containing nucleoside triphosphate hydrolase
41	PGSC0003DMG400017556	1947.63	455.42	2.0964	2.3387e-16	1.1971e-14	UP	5703.02	1803.4	1.661	0.00097866	0.0075087	UP	5905.91	422.471	3.8052	1.2705e-08	7.5018e-07	UP	--	--	--	--	--	--	K03542 photosystem II 22kDa protein | (RefSeq) photosystem II 22 kDa protein, chloroplastic	http://www.genome.jp/dbget-bin/www_bget?sot:102593103	NPQ4	Chlorophyll a/b binding protein domain||Chlorophyll A-B binding protein
42	PGSC0003DMG400018789	1685.92	592.176	1.5094	0.017301	0.047148	UP	5014.58	1565.67	1.6793	0.00059603	0.0050195	UP	5204.7	548.065	3.2474	1.188e-08	7.0564e-07	UP	GO:0008152//GO:0008150	metabolic process//biological_process	--	--	GO:0016787//GO:0003674//GO:0003824	hydrolase activity//molecular_function//catalytic activity	no KO assigned | (RefSeq) probable carboxylesterase 120	http://www.genome.jp/dbget-bin/www_bget?sot:102580350	-	Alpha/Beta hydrolase fold||Alpha/beta hydrolase fold-3
43	PGSC0003DMG400018793	146.908	61.6232	1.2534	0.001568	0.0060456	UP	318.074	136.114	1.2245	0.00043663	0.0038809	UP	329.529	57.0494	2.5301	2.8494e-09	1.9442e-07	UP	--	--	--	--	--	--	no KO assigned | (RefSeq) uncharacterized LOC102606038	http://www.genome.jp/dbget-bin/www_bget?sot:102606038	-	Chlorophyll a/b binding protein domain
44	PGSC0003DMG400019679	10.3774	0	Inf	0.0061213	0.01942	UP	211.895	9.64261	4.4578	0.001163	0.0086026	UP	219.639	0	Inf	3.7289e-07	1.5231e-05	UP	--	--	--	--	GO:0016740//GO:0016747//GO:0003824//GO:0016746//GO:0003674	transferase activity//transferase activity, transferring acyl groups other than amino-acyl groups//catalytic activity//transferase activity, transferring acyl groups//molecular_function	no KO assigned | (RefSeq) acylsugar acyltransferase 3-like	http://www.genome.jp/dbget-bin/www_bget?sot:102597144	-	Transferase
45	PGSC0003DMG400020334	253.483	2.88821	6.4556	3.2929e-09	5.0107e-08	UP	950.093	235.099	2.0148	0.00084229	0.0066523	UP	983.972	2.6723	8.5244	2.2896e-18	8.1274e-16	UP	GO:0009072//GO:0046394//GO:0044237//GO:0016053//GO:1901360//GO:0044238//GO:0043436//GO:0006807//GO:0009058//GO:0019752//GO:1901607//GO:0006570//GO:0071704//GO:0009073//GO:1901605//GO:0006725//GO:1901576//GO:0006520//GO:0009095//GO:0008152//GO:0006571//GO:0009987//GO:0044281//GO:1901362//GO:0008652//GO:0006082//GO:0055114//GO:0019438//GO:0044283//GO:1901566//GO:0044249//GO:0008150//GO:1901564	aromatic amino acid family metabolic process//carboxylic acid biosynthetic process//cellular metabolic process//organic acid biosynthetic process//organic cyclic compound metabolic process//primary metabolic process//oxoacid metabolic process//nitrogen compound metabolic process//biosynthetic process//carboxylic acid metabolic process//alpha-amino acid biosynthetic process//tyrosine metabolic pro…	GO:0043229//GO:0044424//GO:0044464//GO:0005622//GO:0005623//GO:0044444//GO:0043227//GO:0005575//GO:0043231//GO:0005737//GO:0009507//GO:0043226//GO:0009536	intracellular organelle//intracellular part//cell part//intracellular//cell//cytoplasmic part//membrane-bounded organelle//cellular_component//intracellular membrane-bounded organelle//cytoplasm//chloroplast//organelle//plastid	GO:0008977//GO:0016627//GO:0003674//GO:0016628//GO:0003824//GO:0004665//GO:0016491	prephenate dehydrogenase (NAD+) activity//oxidoreductase activity, acting on the CH-CH group of donors//molecular_function//oxidoreductase activity, acting on the CH-CH group of donors, NAD or NADP as acceptor//catalytic activity//prephenate dehydrogenase (NADP+) activity//oxidoreductase activity	K15227 arogenate dehydrogenase (NADP+), plant [EC:1.3.1.78] | (RefSeq) arogenate dehydrogenase 2, chloroplastic-like	http://www.genome.jp/dbget-bin/www_bget?sot:102587993	-	Prephenate dehydrogenase||6-phosphogluconate dehydrogenase C-terminal domain-like||Arogenate dehydrogenase 2||NAD(P)-binding domain
46	PGSC0003DMG400020515	168.399	69.3297	1.2803	0.00088733	0.0036905	UP	899.574	155.944	2.5282	2.9531e-19	9.1786e-17	UP	932.961	64.3439	3.8579	1.432e-28	2.0333e-25	UP	GO:0019752//GO:0009069//GO:0044282//GO:0044238//GO:0043436//GO:0009071//GO:0006807//GO:1901575//GO:0044237//GO:0009063//GO:0016054//GO:0019464//GO:0006544//GO:0008150//GO:1901564//GO:0009987//GO:0044281//GO:0044248//GO:0006082//GO:0009056//GO:0046395//GO:0008152//GO:1901565//GO:1901606//GO:0071704//GO:1901605//GO:0006546//GO:0006520	carboxylic acid metabolic process//serine family amino acid metabolic process//small molecule catabolic process//primary metabolic process//oxoacid metabolic process//serine family amino acid catabolic process//nitrogen compound metabolic process//organic substance catabolic process//cellular metabolic process//cellular amino acid catabolic process//organic acid catabolic process//glycine decarbo…	GO:0005623//GO:0044444//GO:0044464//GO:0005960//GO:1990204//GO:0005622//GO:0044424//GO:0043229//GO:0043226//GO:1902494//GO:0005737//GO:0032991//GO:0005739//GO:0043227//GO:0043231//GO:0005575	cell//cytoplasmic part//cell part//glycine cleavage complex//oxidoreductase complex//intracellular//intracellular part//intracellular organelle//organelle//catalytic complex//cytoplasm//protein-containing complex//mitochondrion//membrane-bounded organelle//intracellular membrane-bounded organelle//cellular_component	--	--	K02437 glycine cleavage system H protein | (RefSeq) glycine cleavage system H protein, mitochondrial-like	http://www.genome.jp/dbget-bin/www_bget?sot:102598788	-	2-oxo acid dehydrogenase, lipoyl-binding site||Glycine cleavage system H-protein||Glycine cleavage system H-protein, subgroup||Biotin/lipoyl attachment||Glycine cleavage system H-protein/Simiate||Single hybrid motif
47	PGSC0003DMG400022043	43.0918	3.97128	3.4397	0.0082053	0.024995	UP	365.467	39.9087	3.195	0.0018716	0.01266	UP	378.265	3.67441	6.6857	4.033e-07	1.6294e-05	UP	--	--	--	--	GO:0005515//GO:0046983//GO:0005488//GO:0003674	protein binding//protein dimerization activity//binding//molecular_function	no KO assigned | (RefSeq) putative transcription factor bHLH041	http://www.genome.jp/dbget-bin/www_bget?sot:102590917	-	Myc-type, basic helix-loop-helix (bHLH) domain
48	PGSC0003DMG400022208	59.9388	12.6121	2.2487	0.016683	0.04572	UP	344.561	55.6114	2.6313	0.001573	0.010987	UP	356.844	11.702	4.9305	1.3117e-06	4.4853e-05	UP	GO:1901575//GO:0005976//GO:0044238//GO:0006073//GO:0044042//GO:0043170//GO:0030245//GO:0044237//GO:0009056//GO:0044248//GO:0009057//GO:0009987//GO:0008150//GO:0009251//GO:0051273//GO:0051275//GO:0000272//GO:0030243//GO:0016052//GO:0005975//GO:0044260//GO:0044247//GO:0044275//GO:0044262//GO:0071704//GO:0008152//GO:0044264	organic substance catabolic process//polysaccharide metabolic process//primary metabolic process//cellular glucan metabolic process//glucan metabolic process//macromolecule metabolic process//cellulose catabolic process//cellular metabolic process//catabolic process//cellular catabolic process//macromolecule catabolic process//cellular process//biological_process//glucan catabolic process//beta-g…	--	--	GO:0016798//GO:0008810//GO:0003824//GO:0003674//GO:0016787//GO:0004553	hydrolase activity, acting on glycosyl bonds//cellulase activity//catalytic activity//molecular_function//hydrolase activity//hydrolase activity, hydrolyzing O-glycosyl compounds	no KO assigned | (RefSeq) endoglucanase 11-like	http://www.genome.jp/dbget-bin/www_bget?sot:102597198	-	Six-hairpin glycosidase-like||Glycoside hydrolase family 9, His active site||Glycoside hydrolase family 9
49	PGSC0003DMG400022225	37.1252	7.37447	2.3318	0.0023273	0.0085121	UP	105.23	34.2966	1.6174	0.0012726	0.0092451	UP	109.017	6.82473	3.9976	1.2078e-09	9.0938e-08	UP	--	--	--	--	--	--	K20417 palmitoyl-[glycerolipid] 3-(E)-desaturase [EC:1.14.19.43] | (RefSeq) fatty acid desaturase 4, chloroplastic-like	http://www.genome.jp/dbget-bin/www_bget?sot:102586585	-	B domain of TMEM189, localisation domain
50	PGSC0003DMG400023039	40.563	12.3563	1.7149	0.017295	0.047136	UP	134.477	37.5284	1.8413	0.00094589	0.0073007	UP	139.275	11.4636	3.6028	3.688e-07	1.5084e-05	UP	--	--	--	--	GO:0003824//GO:0003674//GO:0016787	catalytic activity//molecular_function//hydrolase activity	no KO assigned | (RefSeq) nudix hydrolase 2-like	http://www.genome.jp/dbget-bin/www_bget?sot:102600703	-	Nudix hydrolase 6-like||NUDIX hydrolase domain||NUDIX hydrolase domain-like||NUDIX hydrolase, conserved site
51	PGSC0003DMG400023751	63.3843	20.5914	1.6221	0.0048255	0.015849	UP	204.328	58.7396	1.7985	0.0014017	0.0099936	UP	212.334	19.168	3.4696	1.3302e-06	4.5431e-05	UP	--	--	--	--	GO:0009055//GO:0003674	electron transfer activity//molecular_function	no KO assigned | (RefSeq) basic blue protein-like	http://www.genome.jp/dbget-bin/www_bget?sot:102587061	-	Cupredoxin||Phytocyanin domain
52	PGSC0003DMG400023843	242.788	7.72936	4.9732	0.005363	0.017342	UP	679.877	225.992	1.589	0.0073043	0.03759	UP	704.156	7.1604	6.6197	4.007e-21	2.5421e-18	UP	GO:0071704//GO:0008152//GO:0055114//GO:0008150//GO:0044238//GO:0006629	organic substance metabolic process//metabolic process//oxidation-reduction process//biological_process//primary metabolic process//lipid metabolic process	GO:0005575//GO:0016020//GO:0016021//GO:0044425//GO:0031224	cellular_component//membrane//integral component of membrane//membrane part//intrinsic component of membrane	GO:0003674//GO:0016717//GO:0016491//GO:0003824//GO:0016705	molecular_function//oxidoreductase activity, acting on paired donors, with oxidation of a pair of donors resulting in the reduction of molecular oxygen to two molecules of water//oxidoreductase activity//catalytic activity//oxidoreductase activity, acting on paired donors, with incorporation or reduction of molecular oxygen	no KO assigned | (RefSeq) delta(12) oleic acid desaturase FAD2-like	http://www.genome.jp/dbget-bin/www_bget?sot:102597622	-	Fatty acid desaturase, N-terminal||Fatty acid desaturase domain
53	PGSC0003DMG400024997	402.245	152.164	1.4024	5.5169e-06	4.0998e-05	UP	864.517	372.768	1.2136	3.3982e-06	6.4257e-05	UP	896.815	141.258	2.6665	2.3817e-16	6.1753e-14	UP	--	--	--	--	--	--	K14487 auxin responsive GH3 gene family | (RefSeq) indole-3-acetic acid-amido synthetase GH3.6-like	http://www.genome.jp/dbget-bin/www_bget?sot:102584700	-	GH3 family
54	PGSC0003DMG400025860	84.8494	10.5859	3.0028	2.7638e-07	2.7947e-06	UP	339.729	78.5045	2.1135	0.00017073	0.0017682	UP	351.854	9.84439	5.1595	4.0818e-11	4.5076e-09	UP	--	--	--	--	--	--	no KO assigned | (RefSeq) uncharacterized LOC102599039	http://www.genome.jp/dbget-bin/www_bget?sot:102599039	--	--
55	PGSC0003DMG400026409	3984.45	1962.18	1.0219	1.7028e-05	0.00011226	UP	20795.8	3690.19	2.4945	2.8184e-14	3.5483e-12	UP	21554.3	1817.84	3.5677	3.2044e-22	2.3304e-19	UP	GO:0044237//GO:0015977//GO:0043094//GO:0009058//GO:0015979//GO:0008152//GO:0071704//GO:0009853//GO:0044249//GO:0008150//GO:0055114//GO:0009987	cellular metabolic process//carbon fixation//cellular metabolic compound salvage//biosynthetic process//photosynthesis//metabolic process//organic substance metabolic process//photorespiration//cellular biosynthetic process//biological_process//oxidation-reduction process//cellular process	GO:0044424//GO:0043229//GO:0044444//GO:0005623//GO:0005622//GO:0044464//GO:0005737//GO:0009507//GO:0005575//GO:0043231//GO:0043227//GO:0009536//GO:0043226	intracellular part//intracellular organelle//cytoplasmic part//cell//intracellular//cell part//cytoplasm//chloroplast//cellular_component//intracellular membrane-bounded organelle//membrane-bounded organelle//plastid//organelle	GO:0004497//GO:0016984//GO:0016830//GO:0016831//GO:0016829//GO:0003674//GO:0016491//GO:0003824	monooxygenase activity//ribulose-bisphosphate carboxylase activity//carbon-carbon lyase activity//carboxy-lyase activity//lyase activity//molecular_function//oxidoreductase activity//catalytic activity	K01602 ribulose-bisphosphate carboxylase small chain [EC:4.1.1.39] | (RefSeq) RBCS-2B, rbcS2b; ribulose bisphosphate carboxylase small chain 2C, chloroplastic	http://www.genome.jp/dbget-bin/www_bget?sot:102601229	-	Ribulose bisphosphate carboxylase small chain, domain||Ribulose-1,5-bisphosphate carboxylase small subunit, N-terminal||Ribulose bisphosphate carboxylase, small chain
56	PGSC0003DMG400028287	1793.96	429.908	2.061	1.2699e-05	8.6511e-05	UP	3754.94	1662.1	1.1758	0.00037457	0.0034116	UP	3891.05	398.494	3.2875	1.5624e-17	4.956e-15	UP	GO:0009987//GO:0042451//GO:1901362//GO:0044281//GO:0006790//GO:0009163//GO:0042455//GO:0046128//GO:0051188//GO:0019438//GO:0044249//GO:0006556//GO:1901566//GO:1901657//GO:1901564//GO:0008150//GO:0071704//GO:0006725//GO:0055086//GO:0006730//GO:1901576//GO:0006575//GO:0044272//GO:0008152//GO:0046129//GO:1901137//GO:0042398//GO:0046500//GO:0044238//GO:0046483//GO:0051186//GO:0009108//GO:0009058//GO:…	cellular process//purine nucleoside biosynthetic process//organic cyclic compound biosynthetic process//small molecule metabolic process//sulfur compound metabolic process//nucleoside biosynthetic process//ribonucleoside biosynthetic process//purine ribonucleoside metabolic process//cofactor biosynthetic process//aromatic compound biosynthetic process//cellular biosynthetic process//S-adenosylmet…	--	--	GO:0004478//GO:0097159//GO:1901363//GO:0003824//GO:0030554//GO:0016740//GO:0043167//GO:0036094//GO:0003674//GO:0005524//GO:0032553//GO:0032555//GO:0035639//GO:0032550//GO:0043169//GO:0016765//GO:0000166//GO:0001883//GO:0001882//GO:0097367//GO:0046872//GO:1901265//GO:0017076//GO:0043168//GO:0005488//GO:0032549//GO:0032559	methionine adenosyltransferase activity//organic cyclic compound binding//heterocyclic compound binding//catalytic activity//adenyl nucleotide binding//transferase activity//ion binding//small molecule binding//molecular_function//ATP binding//ribonucleotide binding//purine ribonucleotide binding//purine ribonucleoside triphosphate binding//purine ribonucleoside binding//cation binding//transfera…	K00789 S-adenosylmethionine synthetase [EC:2.5.1.6] | (RefSeq) S-adenosylmethionine synthase 3-like	http://www.genome.jp/dbget-bin/www_bget?sot:102586863	-	S-adenosylmethionine synthetase, central domain||S-adenosylmethionine synthetase||S-adenosylmethionine synthetase superfamily||S-adenosylmethionine synthetase, conserved site||S-adenosylmethionine synthetase, N-terminal||S-adenosylmethionine synthetase, C-terminal
57	PGSC0003DMG400028710	251.141	81.2263	1.6285	0.0037427	0.012794	UP	856.58	232.707	1.8801	1.9907e-08	7.0627e-07	UP	887.638	75.3148	3.559	2.6212e-21	1.8176e-18	UP	GO:0015843//GO:0050896//GO:0015696//GO:0015695//GO:0051179//GO:0015837//GO:0009605//GO:0006812//GO:0055085//GO:0019755//GO:0006811//GO:0051704//GO:0008150//GO:0051234//GO:0098662//GO:0006810//GO:0015672//GO:0009624//GO:0071705//GO:0072488//GO:0009607//GO:0098655//GO:0009987//GO:0043207//GO:0071702//GO:0098660//GO:0034220//GO:0051707	methylammonium transport//response to stimulus//ammonium transport//organic cation transport//localization//amine transport//response to external stimulus//cation transport//transmembrane transport//one-carbon compound transport//ion transport//multi-organism process//biological_process//establishment of localization//inorganic cation transmembrane transport//transport//monovalent inorganic catio…	GO:0005623//GO:0031224//GO:0044464//GO:0044425//GO:0016021//GO:0071944//GO:0005575//GO:0016020//GO:0005886	cell//intrinsic component of membrane//cell part//membrane part//integral component of membrane//cell periphery//cellular_component//membrane//plasma membrane	GO:0022890//GO:0015075//GO:0008324//GO:0005215//GO:0008519//GO:0022857//GO:0003674//GO:0015077	inorganic cation transmembrane transporter activity//ion transmembrane transporter activity//cation transmembrane transporter activity//transporter activity//ammonium transmembrane transporter activity//transmembrane transporter activity//molecular_function//monovalent inorganic cation transmembrane transporter activity	K03320 ammonium transporter, Amt family | (RefSeq) ammonium transporter 1 member 2	http://www.genome.jp/dbget-bin/www_bget?sot:102578704	ATAMT1;2	Ammonium transporter, conserved site||Ammonium transporter AmtB-like domain||Ammonium transporter
58	PGSC0003DMG400028953	23.9851	0.936973	4.678	0.00022314	0.0011119	UP	150.56	22.2391	2.7592	1.8712e-08	6.6945e-07	UP	156.18	0.857123	7.5095	5.3525e-21	3.2022e-18	UP	GO:0008152//GO:0008150//GO:0055114	metabolic process//biological_process//oxidation-reduction process	GO:0016020//GO:0005575//GO:0044425//GO:0016021//GO:0031224	membrane//cellular_component//membrane part//integral component of membrane//intrinsic component of membrane	GO:0046906//GO:0005506//GO:0043167//GO:0003674//GO:1901363//GO:0003824//GO:0016491//GO:0097159//GO:0005488//GO:0004497//GO:0046872//GO:0020037//GO:0016705//GO:0043169//GO:0046914	tetrapyrrole binding//iron ion binding//ion binding//molecular_function//heterocyclic compound binding//catalytic activity//oxidoreductase activity//organic cyclic compound binding//binding//monooxygenase activity//metal ion binding//heme binding//oxidoreductase activity, acting on paired donors, with incorporation or reduction of molecular oxygen//cation binding//transition metal ion binding	no KO assigned | (RefSeq) premnaspirodiene oxygenase-like	http://www.genome.jp/dbget-bin/www_bget?sot:102581682	-	Cytochrome P450, E-class, group I||Cytochrome P450, conserved site||Cytochrome P450
59	PGSC0003DMG400029327	12.0983	0	Inf	0.0025509	0.0092036	UP	150.391	11.2064	3.7463	0.0036511	0.021573	UP	155.557	0	Inf	8.9593e-07	3.2871e-05	UP	GO:0032501//GO:0009561//GO:0009559//GO:0048856//GO:0007275//GO:0016043//GO:0006996//GO:0071840//GO:0009553//GO:0048284//GO:0000741//GO:0048869//GO:0009987//GO:0032502//GO:0030154//GO:0010197//GO:0048229//GO:0006997//GO:0008150	multicellular organismal process//megagametogenesis//embryo sac central cell differentiation//anatomical structure development//multicellular organism development//cellular component organization//organelle organization//cellular component organization or biogenesis//embryo sac development//organelle fusion//karyogamy//cellular developmental process//cellular process//developmental process//cell …	GO:0043229//GO:0044424//GO:0044464//GO:0005622//GO:0005634//GO:0005623//GO:0043227//GO:0005575//GO:0043231//GO:0043226	intracellular organelle//intracellular part//cell part//intracellular//nucleus//cell//membrane-bounded organelle//cellular_component//intracellular membrane-bounded organelle//organelle	GO:0005488//GO:0003677//GO:0003674//GO:0097159//GO:0003676//GO:1901363	binding//DNA binding//molecular_function//organic cyclic compound binding//nucleic acid binding//heterocyclic compound binding	no KO assigned | (RefSeq) high mobility group B protein 9	http://www.genome.jp/dbget-bin/www_bget?sot:102584805	-	High mobility group box domain||ARID DNA-binding domain
60	PGSC0003DMG400031110	90.9094	21.9961	2.0472	8.8245e-05	0.00048777	UP	172.126	84.0091	1.0349	0.0069082	0.035923	UP	178.462	20.3898	3.1297	7.0851e-10	5.7194e-08	UP	--	--	--	--	GO:0003824//GO:0016788//GO:0003674//GO:0016787	catalytic activity//hydrolase activity, acting on ester bonds//molecular_function//hydrolase activity	no KO assigned | (RefSeq) uncharacterized LOC102585322	http://www.genome.jp/dbget-bin/www_bget?sot:102585322	-	GPI inositol-deacylase PGAP1-like||Alpha/Beta hydrolase fold
61	PGSC0003DMG400031849	129.299	16.7506	2.9484	0.01127	0.032703	UP	1476.79	120.194	3.619	0.00022375	0.0022248	UP	1531.14	15.5136	6.6249	1.863e-08	1.0561e-06	UP	GO:0008150//GO:0008152	biological_process//metabolic process	--	--	GO:0003824//GO:0003674//GO:0016787	catalytic activity//molecular_function//hydrolase activity	no KO assigned | (RefSeq) 2-hydroxyisoflavanone dehydratase-like	http://www.genome.jp/dbget-bin/www_bget?sot:102588409	-	Alpha/beta hydrolase fold-3||Alpha/Beta hydrolase fold
62	PGSC0003DMG400032121	48.6971	0.618515	6.2989	0.00036782	0.0017237	UP	236.364	45.2468	2.3851	0.0026825	0.016777	UP	244.75	0.573049	8.7384	8.7301e-11	9.0384e-09	UP	GO:0008152//GO:0055114//GO:0008150	metabolic process//oxidation-reduction process//biological_process	--	--	GO:0003674//GO:0003824//GO:0016491	molecular_function//catalytic activity//oxidoreductase activity	no KO assigned | (RefSeq) secoisolariciresinol dehydrogenase-like	http://www.genome.jp/dbget-bin/www_bget?sot:102589358	-	Short-chain dehydrogenase/reductase, conserved site||NAD(P)-binding domain||Short-chain dehydrogenase/reductase SDR
63	PGSC0003DMG400032199	14128.6	1890.63	2.9017	1.1399e-09	1.9093e-08	UP	42195.2	13091.7	1.6884	1.3814e-08	5.1652e-07	UP	43764.4	1750.83	4.6436	1.67e-32	4.1496e-29	UP	GO:0008150//GO:0006979//GO:0009056//GO:0055114//GO:0009987//GO:0044248//GO:0008152//GO:0042744//GO:0072593//GO:0050896//GO:0042743//GO:0044237//GO:0006950	biological_process//response to oxidative stress//catabolic process//oxidation-reduction process//cellular process//cellular catabolic process//metabolic process//hydrogen peroxide catabolic process//reactive oxygen species metabolic process//response to stimulus//hydrogen peroxide metabolic process//cellular metabolic process//response to stress	GO:0005575//GO:0005576	cellular_component//extracellular region	GO:0016491//GO:1901363//GO:0003824//GO:0016684//GO:0097159//GO:0046906//GO:0004601//GO:0003674//GO:0043167//GO:0020037//GO:0016209//GO:0043169//GO:0005488//GO:0046872	oxidoreductase activity//heterocyclic compound binding//catalytic activity//oxidoreductase activity, acting on peroxide as acceptor//organic cyclic compound binding//tetrapyrrole binding//peroxidase activity//molecular_function//ion binding//heme binding//antioxidant activity//cation binding//binding//metal ion binding	K00430 peroxidase [EC:1.11.1.7] | (RefSeq) lignin-forming anionic peroxidase-like	http://www.genome.jp/dbget-bin/www_bget?sot:102588377	-	Peroxidase, active site||Plant peroxidase||Haem peroxidase||Peroxidases heam-ligand binding site||Secretory peroxidase||Haem peroxidase, plant/fungal/bacterial
64	PGSC0003DMG400032528	1222.94	402.959	1.6016	6.542e-10	1.1595e-08	UP	2655.96	1133.39	1.2286	2.1021e-07	5.6406e-06	UP	2755.15	372.93	2.8852	1.4467e-22	1.1352e-19	UP	--	--	GO:0009706//GO:0031969//GO:0044424//GO:0044446//GO:0043229//GO:0044422//GO:0031090//GO:0044435//GO:0009528//GO:0044434//GO:0031967//GO:0019866//GO:0005623//GO:0044444//GO:0005622//GO:0044464//GO:0009941//GO:0009507//GO:0005737//GO:0043231//GO:0009526//GO:0005575//GO:0043227//GO:0016020//GO:0005739//GO:0042170//GO:0009536//GO:0031975//GO:0043226	chloroplast inner membrane//chloroplast membrane//intracellular part//intracellular organelle part//intracellular organelle//organelle part//organelle membrane//plastid part//plastid inner membrane//chloroplast part//organelle envelope//organelle inner membrane//cell//cytoplasmic part//intracellular//cell part//chloroplast envelope//chloroplast//cytoplasm//intracellular membrane-bounded organelle…	--	--	no KO assigned | (RefSeq) protein RETICULATA-RELATED 4, chloroplastic	http://www.genome.jp/dbget-bin/www_bget?sot:102602697	-	Protein RETICULATA-related
65	PGSC0003DMG400033049	15.0171	0.361026	5.3784	0.0020103	0.0074969	UP	95.4663	13.9212	2.7777	1.9557e-06	4.0024e-05	UP	99.1186	0.334037	8.213	1.283e-15	3.2146e-13	UP	GO:0006793//GO:0008152//GO:0044260//GO:0071704//GO:0008150//GO:0043412//GO:0006796//GO:0009987//GO:0044237//GO:0006464//GO:0016310//GO:0043170//GO:0044267//GO:0019538//GO:0006468//GO:0044238//GO:0036211	phosphorus metabolic process//metabolic process//cellular macromolecule metabolic process//organic substance metabolic process//biological_process//macromolecule modification//phosphate-containing compound metabolic process//cellular process//cellular metabolic process//cellular protein modification process//phosphorylation//macromolecule metabolic process//cellular protein metabolic process//pro…	GO:0005575//GO:0016020//GO:0044425//GO:0016021//GO:0031224	cellular_component//membrane//membrane part//integral component of membrane//intrinsic component of membrane	GO:0032550//GO:0035639//GO:0032555//GO:0032553//GO:0005524//GO:0016301//GO:0003674//GO:0036094//GO:0043167//GO:0016740//GO:0003824//GO:0030554//GO:1901363//GO:0097159//GO:0032549//GO:0032559//GO:0005488//GO:0043168//GO:0017076//GO:1901265//GO:0097367//GO:0001882//GO:0016772//GO:0004672//GO:0001883//GO:0000166//GO:0016773//GO:0004674	purine ribonucleoside binding//purine ribonucleoside triphosphate binding//purine ribonucleotide binding//ribonucleotide binding//ATP binding//kinase activity//molecular_function//small molecule binding//ion binding//transferase activity//catalytic activity//adenyl nucleotide binding//heterocyclic compound binding//organic cyclic compound binding//ribonucleoside binding//adenyl ribonucleotide bin…	no KO assigned | (RefSeq) probable LRR receptor-like serine/threonine-protein kinase At1g74360	http://www.genome.jp/dbget-bin/www_bget?sot:102581992	-	Protein kinase-like domain||Leucine-rich repeat||Protein kinase, ATP binding site||Serine/threonine-protein kinase, active site||Leucine-rich repeat, typical subtype||Leucine-rich repeat domain, L domain-like||Protein kinase domain||Leucine-rich repeat-containing N-terminal, plant-type
66	PGSC0003DMG400035878	871.04	151.266	2.5257	0.016857	0.046137	UP	3340.08	809.139	2.0454	0.0011296	0.0084139	UP	3458.01	140.183	4.6246	1.1833e-09	8.9928e-08	UP	GO:0071704//GO:0008152//GO:0055114//GO:0008150//GO:0044238//GO:0006629	organic substance metabolic process//metabolic process//oxidation-reduction process//biological_process//primary metabolic process//lipid metabolic process	GO:0016020//GO:0005575//GO:0016021//GO:0044425//GO:0031224	membrane//cellular_component//integral component of membrane//membrane part//intrinsic component of membrane	GO:0003674//GO:0016717//GO:0003824//GO:0016491//GO:0016705	molecular_function//oxidoreductase activity, acting on paired donors, with oxidation of a pair of donors resulting in the reduction of molecular oxygen to two molecules of water//catalytic activity//oxidoreductase activity//oxidoreductase activity, acting on paired donors, with incorporation or reduction of molecular oxygen	no KO assigned | (RefSeq) delta(12) oleic acid desaturase FAD2-like	http://www.genome.jp/dbget-bin/www_bget?sot:102598049	-	Fatty acid desaturase, N-terminal||Fatty acid desaturase domain
67	PGSC0003DMG401012961	379.143	163.375	1.2146	0.00027193	0.0013238	UP	750.587	350.838	1.0972	0.0011427	0.0084959	UP	779.469	151.62	2.362	8.9626e-07	3.2871e-05	UP	GO:0008152//GO:0006508//GO:0071704//GO:0008150//GO:0043170//GO:0044238//GO:0019538	metabolic process//proteolysis//organic substance metabolic process//biological_process//macromolecule metabolic process//primary metabolic process//protein metabolic process	--	--	GO:0016787//GO:0004175//GO:0003674//GO:0003824//GO:0070011//GO:0004190//GO:0008233//GO:0070001	hydrolase activity//endopeptidase activity//molecular_function//catalytic activity//peptidase activity, acting on L-amino acid peptides//aspartic-type endopeptidase activity//peptidase activity//aspartic-type peptidase activity	no KO assigned | (RefSeq) protein ASPARTIC PROTEASE IN GUARD CELL 1	http://www.genome.jp/dbget-bin/www_bget?sot:102588534	-	Aspartic peptidase domain||Xylanase inhibitor, N-terminal||Xylanase inhibitor, C-terminal||CND41-like||Peptidase family A1 domain||Aspartic peptidase, active site||Aspartic peptidase A1 family
68	PGSC0003DMG401017380	2326.49	796.395	1.5466	0.009091	0.02727	UP	7270.85	2159.59	1.7514	3.7371e-05	0.00049113	UP	7544.69	737.733	3.3543	5.0585e-12	6.5579e-10	UP	GO:0008150//GO:0008152	biological_process//metabolic process	--	--	GO:0016747//GO:0016740//GO:0003824//GO:0016746//GO:0003674	transferase activity, transferring acyl groups other than amino-acyl groups//transferase activity//catalytic activity//transferase activity, transferring acyl groups//molecular_function	K00626 acetyl-CoA C-acetyltransferase [EC:2.3.1.9] | (RefSeq) acetyl-CoA acetyltransferase, cytosolic 1-like	http://www.genome.jp/dbget-bin/www_bget?sot:102600847	-	Thiolase, conserved site||Thiolase, C-terminal||Thiolase, N-terminal||Thiolase||Thiolase-like||Thiolase, active site
69	PGSC0003DMG401023899	36.9676	2.32624	3.9902	0.00032137	0.0015322	UP	99.2205	34.2997	1.5324	0.0031871	0.019337	UP	102.834	2.14657	5.5821	1.7986e-12	2.6288e-10	UP	--	--	--	--	--	--	K19366 spartin | (RefSeq) uncharacterized LOC102590062	http://www.genome.jp/dbget-bin/www_bget?sot:102590062	-	Senescence/spartin-associated
70	PGSC0003DMG401030469	2153.56	810.944	1.409	5.8023e-09	8.3833e-08	UP	4657.29	1995.83	1.2225	7.4029e-07	1.7057e-05	UP	4827.11	751.968	2.6824	5.833e-21	3.4102e-18	UP	GO:0008150//GO:0055114//GO:0008152	biological_process//oxidation-reduction process//metabolic process	--	--	GO:0003824//GO:1901363//GO:0016491//GO:0097159//GO:0046906//GO:0005506//GO:0043167//GO:0003674//GO:0020037//GO:0016705//GO:0043169//GO:0046914//GO:0004497//GO:0005488//GO:0046872	catalytic activity//heterocyclic compound binding//oxidoreductase activity//organic cyclic compound binding//tetrapyrrole binding//iron ion binding//ion binding//molecular_function//heme binding//oxidoreductase activity, acting on paired donors, with incorporation or reduction of molecular oxygen//cation binding//transition metal ion binding//monooxygenase activity//binding//metal ion binding	K00487 trans-cinnamate 4-monooxygenase [EC:1.14.13.11] | (RefSeq) trans-cinnamate 4-monooxygenase	http://www.genome.jp/dbget-bin/www_bget?sot:102605644	-	Cytochrome P450, E-class, group I||Cytochrome P450, conserved site||Cytochrome P450
71	PGSC0003DMG402001494	40567.9	16161	1.3278	0.0030054	0.010578	UP	93005.3	37603.2	1.3065	0.0053578	0.029317	UP	96359.1	14946	2.6887	7.0632e-07	2.6932e-05	UP	GO:0008150//GO:0009607//GO:0006952//GO:0050896//GO:0006950	biological_process//response to biotic stimulus//defense response//response to stimulus//response to stress	--	--	--	--	no KO assigned | (RefSeq) pathogenesis-related protein STH-2-like	http://www.genome.jp/dbget-bin/www_bget?sot:102582578	-	START-like domain||Bet v I type allergen||Bet v I/Major latex protein
72	PGSC0003DMG402002599	101.845	14.3175	2.8305	0.013813	0.038913	UP	213.503	93.9996	1.1835	0.0013439	0.00966	UP	221.449	13.217	4.0665	3.8634e-15	8.9299e-13	UP	--	--	--	--	GO:0003674//GO:0030246//GO:0005488	molecular_function//carbohydrate binding//binding	no KO assigned | (RefSeq) jacalin-related lectin 19	http://www.genome.jp/dbget-bin/www_bget?sot:102598450	-	Jacalin-like lectin domain, plant||Jacalin-like lectin domain
73	PGSC0003DMG402023844	52.8806	4.5898	3.5262	0.017407	0.047403	UP	222.227	49.186	2.1757	5.8788e-05	0.00072009	UP	230.179	4.24745	5.76	1.5493e-17	4.956e-15	UP	GO:0008150//GO:0071704//GO:0008152//GO:0044238//GO:0006629	biological_process//organic substance metabolic process//metabolic process//primary metabolic process//lipid metabolic process	GO:0005575//GO:0016020//GO:0031224//GO:0016021//GO:0044425	cellular_component//membrane//intrinsic component of membrane//integral component of membrane//membrane part	--	--	no KO assigned | (RefSeq) delta(12) oleic acid desaturase FAD2-like	http://www.genome.jp/dbget-bin/www_bget?sot:102597622	-	Fatty acid desaturase domain
